# Supplementary material for: A multifunctional stimuli-responsive AIE-active Schiff base for solvatochromism, mechanochromism, acidochromism, Cu 2+ sensing and DNA binding
Source: Royal Society of Chemistry journal article supplement (doi:10.1039/d5nj04403k), 2026-01-01
Supplement: d5nj04403k1.pdf [file d5nj04403k1.pdf]

## **Supplementary Materials**

### **A Multifunctional Stimuli-Responsive AIE-Active Schiff Base for Solvatochromism, Mechanochromism, Acidochromism, Cu<sup>2+</sup> Sensing and DNA Binding**

*Pankaj Haloi<sup>a</sup>, Ram Kumar Mandal<sup>a</sup>, Sanchita Das<sup>b</sup>, Rupam Dinda<sup>b</sup>, Pranjit Barman<sup>a\*</sup>*

<sup>a</sup>Department of Chemistry, National Institute of Technology, Silchar, Assam 788010, India.

<sup>b</sup>Department of Chemistry, National Institute of Technology, Rourkela, Odisha 769008, India.

**\*Author for correspondence:** Pranjit Barman

(Email: [barmanpranjit@yahoo.co.in](mailto:barmanpranjit@yahoo.co.in))

## **Table of Contents**

- 1. Experimental Section
  - 1.1. Reagents and Chemicals
  - 1.2. Instrumentation
  - 1.3. Characterization of HL
  - 1.4. Preparation of Stock Solutions
  - 1.5. Preparation of Biological Samples
  - 1.6. Theoretical Calculations
  - 1.7. Calculation of Quantum Yield
  - 1.8. Determination of limit of detection (LOD)
  - 1.9. Determination of Stern-volmer constant ( $K_{SV}$ )
  - 1.10. Determination of Binding Constant ( $K_b$ )

### **1.11. DNA Binding Study**

#### **1.11.1. By UV-visible Spectroscopy**

#### **1.11.2. By Fluorescence Spectroscopy**

### **1.12. Molecular Docking Analysis**

## **List of Figures**

**Fig. S1.** FT-IR spectra of **HL**

**Fig. S2.**  $^1\text{H}$ -NMR spectra of **HL**

**Fig. S3.**  $^{13}\text{C}$ -NMR spectra of **HL**

**Fig. S4.** ESI-MS spectra of **HL**

**Fig. S5.** DLS data of **HL** at different water fractions

**Fig. S6.** Fluorescence spectra of **HL** with and without presence of copper in different pH

**Fig. S7.** Stern-volmer plot at high copper ion concentration

**Fig. S8.** Stern-volmer plot at low copper ion concentration

**Fig. S9.** BH-plot for binding constant determination

**Fig. S10.** Job's plot for binding stoichiometry determination

**Fig. S11.** ESI-MS spectra of (**HL**+ $\text{Cu}^{2+}$ ) complex

**Fig. S12.** Bar diagram of interference study

**Fig. S13.** Fluorescence spectra of reversibility study

**Fig. S14.** FTIR comparison between **HL** and **HL**+ $\text{Cu}^{2+}$

**Fig. S15.** Optimized geometry and HOMO and LUMO structures of the complex.

## 1. Experimental Section

### 1.1 Reagents and Chemicals

The solvents employed in the spectral experiments were obtained from Sigma-Aldrich and were of spectrophotometric grade. The other chemicals used in this research were sourced from commercial suppliers and were used without further purification.

### 1.2 Instrumentation

The IR spectral data was recorded by Perkin Elmer MIR/FIR-FT-IR spectrophotometer.  $^1\text{H}$  and  $^{13}\text{C}$  nuclear magnetic resonance spectra were recorded using a JEOL JNM ECS400 NMR spectrometer in  $\text{CDCl}_3$  solvent at 400  $\text{MHz}$ . The chemical shift ( $\delta$ ) values were reported in ppm using TMS as reference standard. The ESI positive mass spectra was taken from XEVOG2-XS QTOF spectrometer in DMSO solvent. UV-visible absorption spectra were obtained by using a Cary 60 absorption spectrophotometer. A HITACHI-F4600 spectrophotometer was utilized to record the fluorescence emission spectra.

### 1.3 Characterization

Yield: 86%; Pale yellow crystalline solid; melting point: 163-165°C.

FTIR ( $\nu$ ,  $\text{cm}^{-1}$ ): 3438 (O-H); 2846-2948 (aromatic C-H); 1635 (C=N); 1446 (Aromatic C=C); 1121 (C-O) (**Fig. S1**).

$^1\text{H}$  NMR (400 MHz,  $\text{CDCl}_3$ ) (ppm):  $\delta$  12.31 (s, 1H), 8.85 (s, 1H), 7.97 (s, 1H), 7.80 (d,  $J$  = 7.1 Hz, 2H), 7.66 (s, 1H), 7.56 (d,  $J$  = 3.3 Hz, 2H), 7.45-7.33 (t,  $J$  = 7.5 Hz, 5H), 3.35 (t,  $J$  = 1.6 Hz, 3H) (**Fig. S2**).

$^{13}\text{C}$  NMR (126 MHz,  $\text{DMSO}-d_6$ ) (ppm):  $\delta$  163.45, 161.11, 160.62, 158.72, 135.91, 135.16, 132.82, 131.31, 129.53, 128.78, 128.40, 124.51, 119.31, 118.20, 83.46 (**Fig. S3**).

ESI-Mass: Base peak was obtained at  $m/z$  = 329.05 [ $(\text{C}_{16}\text{H}_{16}\text{N}_2\text{O}_2) + \text{H}]^+ = 329.12$ ] which confirmed the formation of the **HL** (**Fig. S4**).

### 1.4 Preparation of Stock Solutions

~1 mmol stock solutions of **HL** was prepared in four solvents having different polarity. For absorbance and emission analysis, the stock solutions of **HL** was diluted to a concentration of about ~50  $\mu\text{M}$  in a suitable solvent. A combination of ~50  $\mu\text{M}$  THF-water solution was prepared for aggregation investigations. To conduct pH tests, a 1 mmol stock solution was diluted to form a ~50  $\mu\text{M}$  concentration in 1:9 THF-aqueous buffer solution. The pH solution was made by the combination of  $\text{Na}_2\text{HPO}_4$  and  $\text{NaH}_2\text{PO}_4$  produced a 0.1 M phosphate buffer. The metal ion solutions of about ~10 mmol were developed in the water medium. Finally, the absorbance and emission spectra were captured after 10 minutes of mixing [1].

### 1.5 Preparation of Biological Samples

Fresh urine samples were acquired from a participant to investigate the biological samples. Approximately ~10 mL of each sample was combined with ~10 mL of methanol to eliminate proteins. The resultant solutions were centrifuged at 10,000 rpm for ten minutes. The excess fluid was quickly separated and filtered for additional investigation.

### 1.6 Theoretical Calculations

The quantum chemical investigations were conducted using the GAUSSIAN 16 software [2]. The B3LYP 6-311g+(d, p) basis set was utilized for carrying out the optimization of the ground state configuration of **HL** [3]. But, for optimizing the ground state of the complexes of **HL**, the LanL2DZ basic set was selected [4].

### 1.7 Calculation of Quantum Yield

The fluorescence quantum yield was determined by utilizing Rhodamine B as the standard fluorophore [5].

$$\phi_u = \left( \frac{A_s F_u n_u^2}{A_u F_s n_s^2} \right) \phi_s$$

Where ' $\phi_u$ ' is the quantum yield value of the unidentified fluorophore, ' $\phi_s$ ' is the quantum yield value of the fluorophore taken as the standard reference ( $\phi_s = 0.68$  in ethanol medium). ' $A_u$ ' and ' $A_s$ ' are the absorbance values at the excitation wavelength for the unknown and the standard fluorophore, respectively. ' $F_u$ ' and ' $F_s$ ' are the integrated area of fluorescence intensity for the

unknown and the standard fluorophore, respectively. ' $n_u$ ' and ' $n_s$ ' are the refractive index of the unknown and the standard fluorophore, respectively [6].

### 1.8 Determination of Limit of Detection (LOD)

The following equation was used to determine the LOD with the help of fluorescence titration,

$$\text{LOD} = 3\sigma/S$$

where  $\sigma$  stands for standard deviation value of blank measurements, and the S denotes slope of the calibration plot of  $I_0 - I$  vs  $\text{Cu}^{2+}$  ion concentration, where  $I_0$  &  $I$  were emission intensity of ligand in absence and presence of  $\text{Cu}^{2+}$  ions respectively.

### 1.9 Determination of Stern-Volmer constant ( $K_{sv}$ )

The Stern-Volmer formula has been implemented to estimate the degree of fluorescence quenching caused by adding copper ions.

$$\frac{I_o}{I} = 1 + K_{sv} \times [\text{Cu}^{2+}]$$

Where, ' $K_{sv}$ ' is the Stern-Volmer constant, ' $I_o$ ' denotes the intensities of fluorescence in the absence of  $\text{Cu}^{2+}$  ions at different concentrations and ' $I$ ' represents intensities of fluorescence presence of  $\text{Cu}^{2+}$  ions at different concentrations [7].

### 1.10 Determination of Binding Constant ( $K_b$ )

Based on fluorometric titration data, binding constant ( $K_b$ ) was determined by Benesi-Hildebrand equation,

$$\frac{1}{I - I_o} = \left[ \frac{1}{I_{\max} - I_o} \right] \left[ \frac{1}{K_b \cdot C} + 1 \right]$$

where  $I_o$  denotes emission intensity of **HL** alone,  $I$  denote emission intensity of sensor **HL** in different equivalents of  $\text{Cu}^{2+}$  ions,  $I_{\max}$  is emission intensity of sensor **HL** when 2 equivalents of  $\text{Cu}^{2+}$  ions was added and  $C$  is copper ion concentration [8].

### 1.11 DNA Binding Study

### 1.11.1 By UV-vis Spectroscopy

The DNA binding affinity of **HL** with CT-DNA was examined using UV-vis absorption spectroscopy. The experiment was conducted using a solution of 5 mM tris-HCl buffer at pH 7.4. All DNA solutions were prepared fresh in the buffer immediately before use. The concentration of CT-DNA was evaluated at 260 nm, based on its extinction coefficient ( $6600 \text{ M}^{-1} \text{ cm}^{-1}$ ). Moreover, solution of **HL** (25  $\mu\text{M}$ ) were prepared in dimethyl sulfoxide/tris-buffer solution. The **HL** maintained at a constant concentration, were titrated with different concentrations of CT-DNA starting from 0 to 180  $\mu\text{M}$ . The compound-DNA mixtures were allowed to incubate for 5 minutes before UV-visible measurements. Titrations continued until successive additions of CT-DNA no longer caused significant changes in the absorption spectra. The binding association constant ( $K_b$ ) value of interaction between the complexes and CT-DNA was determined by using the following equation.

$$[\text{DNA}] / (\epsilon_a - \epsilon_f) = [\text{DNA}] / (\epsilon_b - \epsilon_f) + 1/K_b (\epsilon_b - \epsilon_f)$$

where  $[\text{DNA}]$  represents the concentration of DNA,  $\epsilon_a$  is apparent molar extinction coefficient at a specific DNA concentration,  $\epsilon_f$  denotes molar extinction coefficient of complexes without DNA, and  $\epsilon_b$  corresponds to molar extinction coefficient of complexes in its fully DNA-bound state [9,10].

### 1.11.2 By Fluorescence spectroscopy

Fluorescence spectrometer was utilized to conduct ethidium bromide (EtBr) displacement assays to evaluate whether the test compounds could replace EtBr in the CT-DNA associated complex. To generate the DNA-EtBr complex, CT-DNA and EtBr were mixed in a 10:1 ratio, and the resulting adduct was excited at 515 nm. Emission spectra were examined in the 500-700 nm range before introducing the test compounds. Fluorescence quenching was observed as a result of the displacement of EtBr, showing that the **HL** competitively bound to DNA. As the concentration of the **HL** increased, changes in the fluorescence intensity of the EtBr-bind CT-DNA complex were monitored [10].

## 1.12 Molecular Docking Analysis

We carried out a molecular docking study on the proposed ligand using AutoDock 4.2 [11]. The receptor structure was retrieved from the Protein Data Bank. This study investigated the interactions of **HL** with CT-DNA. The ligand structure was geometry optimized using the Gaussian 16 software package, and the molecular docking interactions were analyzed with Biovia Discovery Studio Visualizer 4.0 [12].

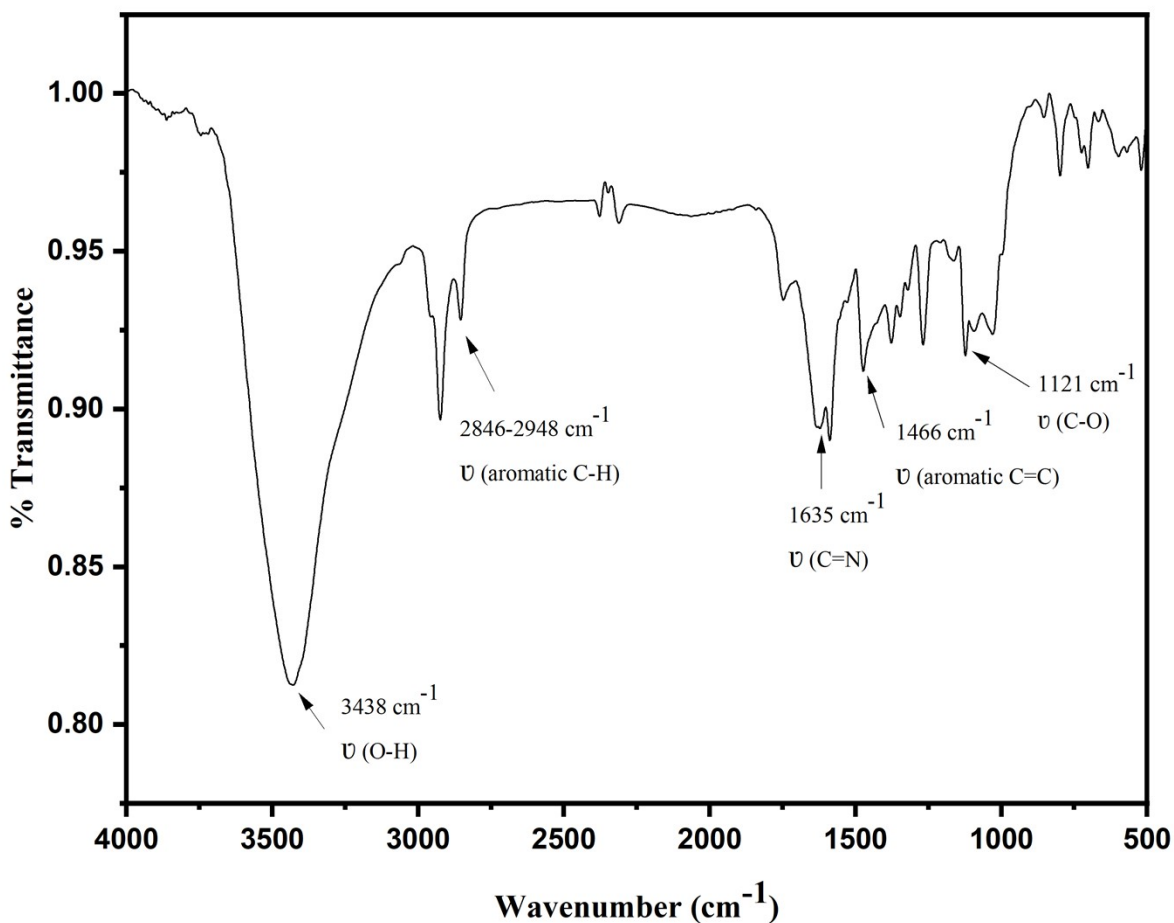

**Fig. S1.** FT-IR spectra of **HL**

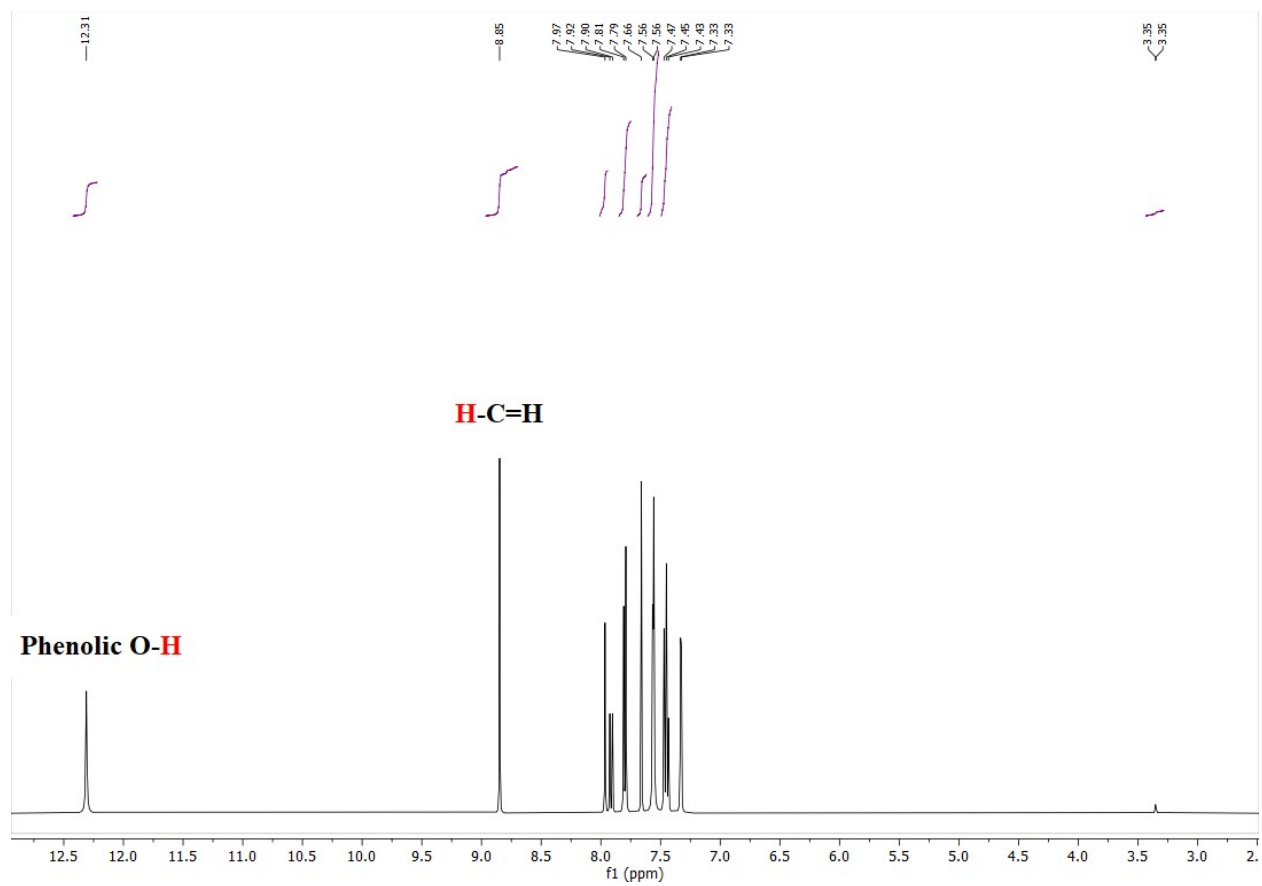

**Fig. S2.**  $^1\text{H}$ -NMR spectra of **HL**



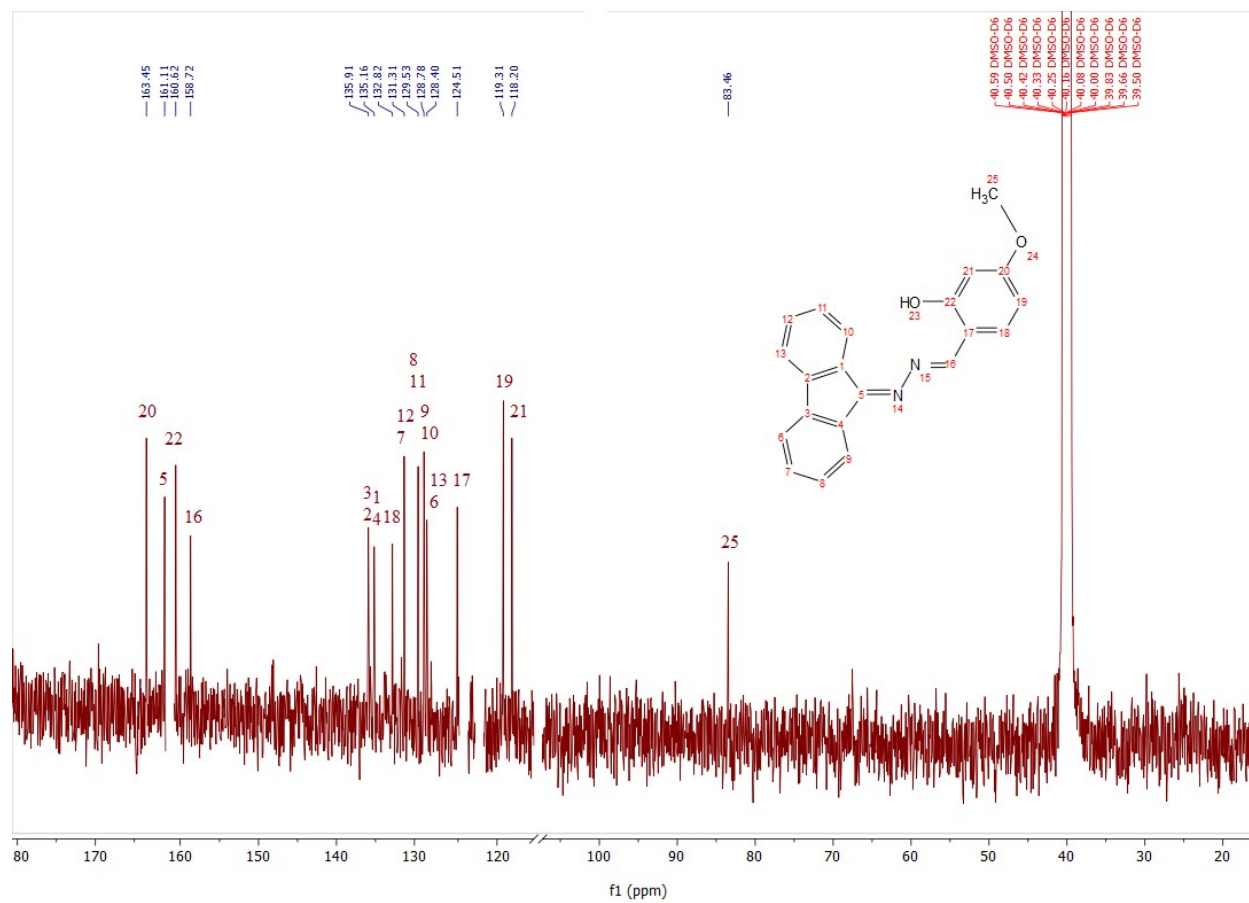

**Fig. S3.**  $^{13}\text{C}$ -NMR spectra of **HL**

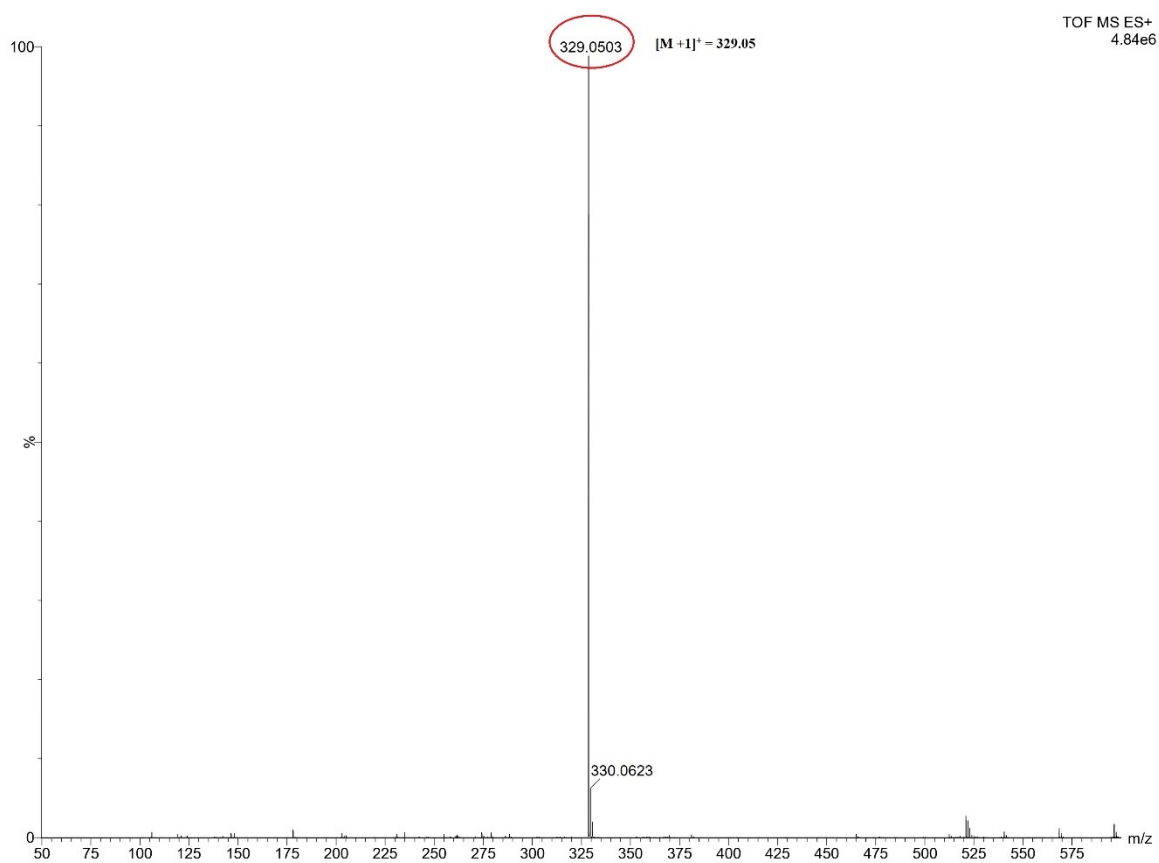

**Fig. S4.** ESI-MS spectra of **HL**

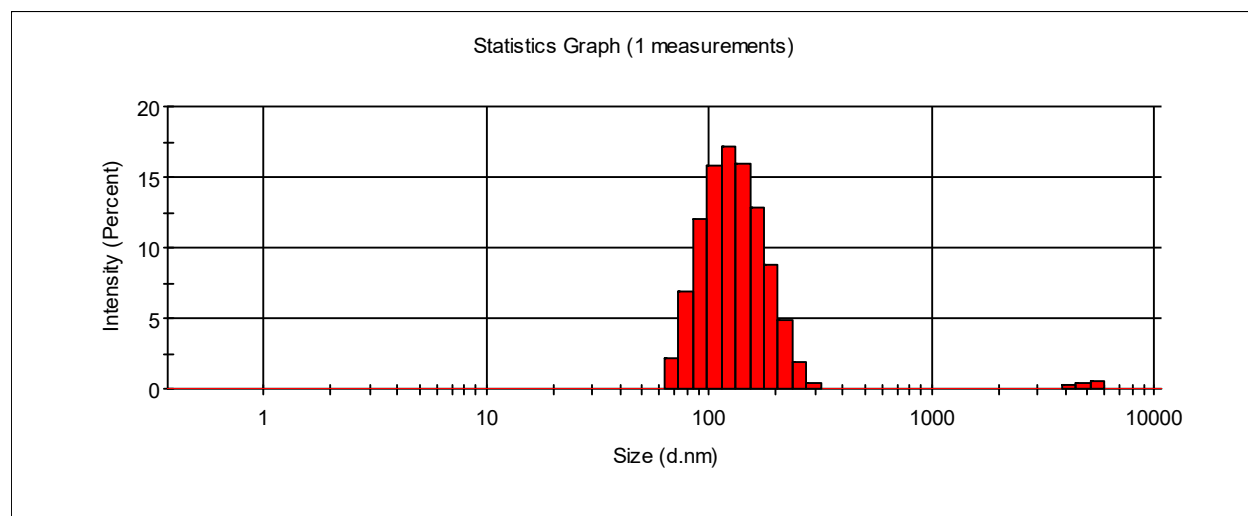

**Fig. S5 (a).** DLS data of **HL** (25  $\mu$ M) at  $f_w = 30\%$

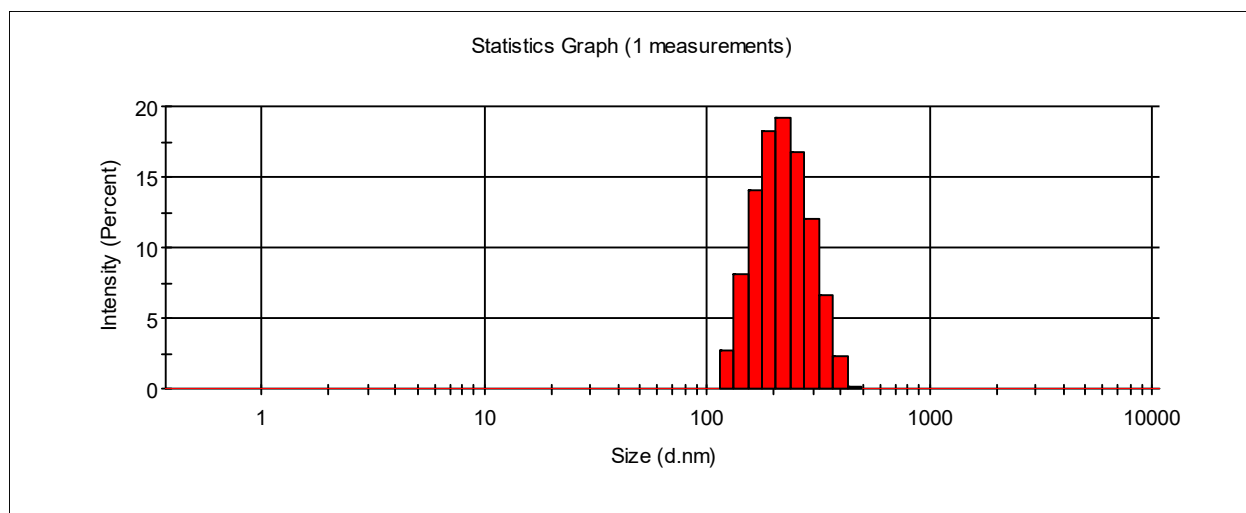

**Fig. S5 (b).** DLS data of **HL** (25  $\mu\text{M}$ ) at  $f_w = 50\%$

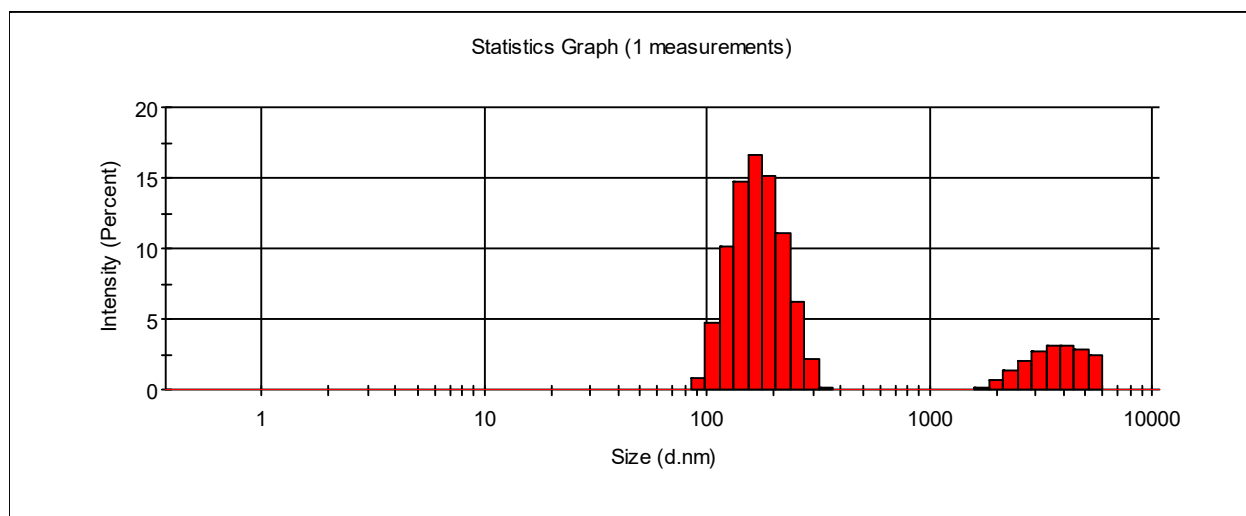

**Fig. S5 (c).** DLS data of **HL** (25  $\mu\text{M}$ ) at  $f_w = 70\%$

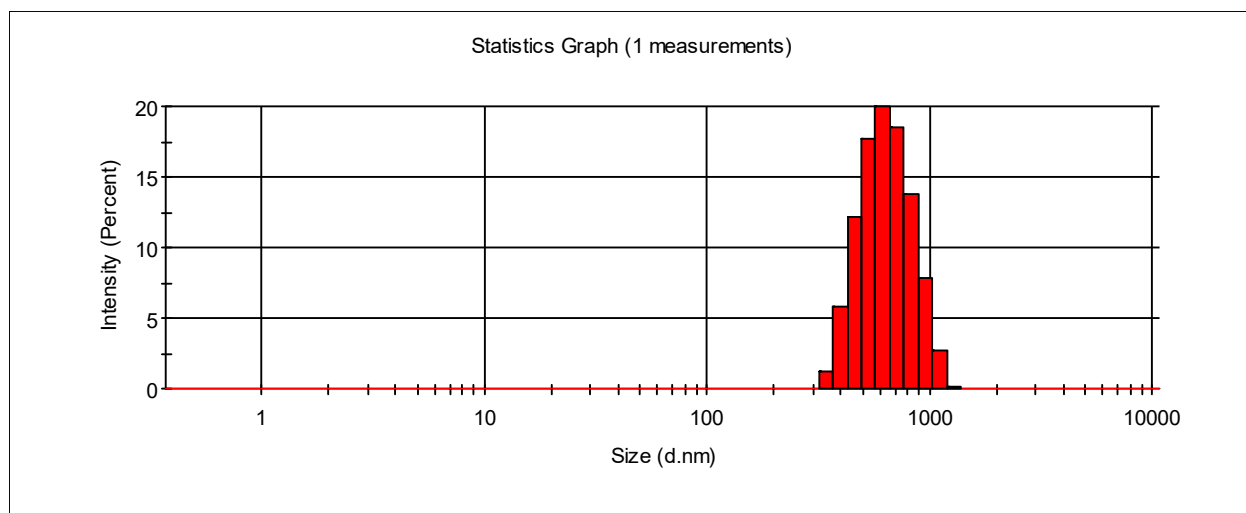

Fig. S5 (d). DLS data of **HL** (25  $\mu\text{M}$ ) at  $f_w = 95\%$

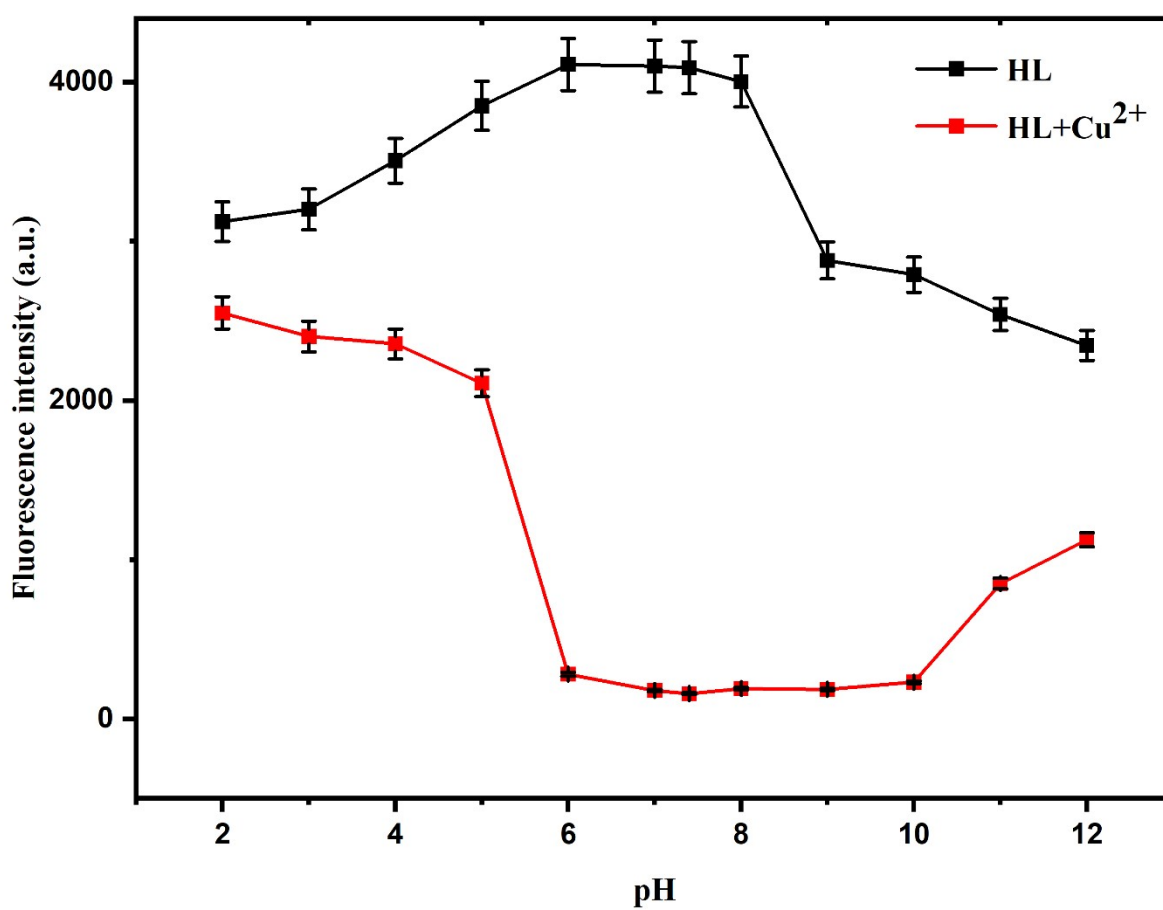

Fig. S6. Fluorescence spectra of **HL** with and without presence of copper in different pH

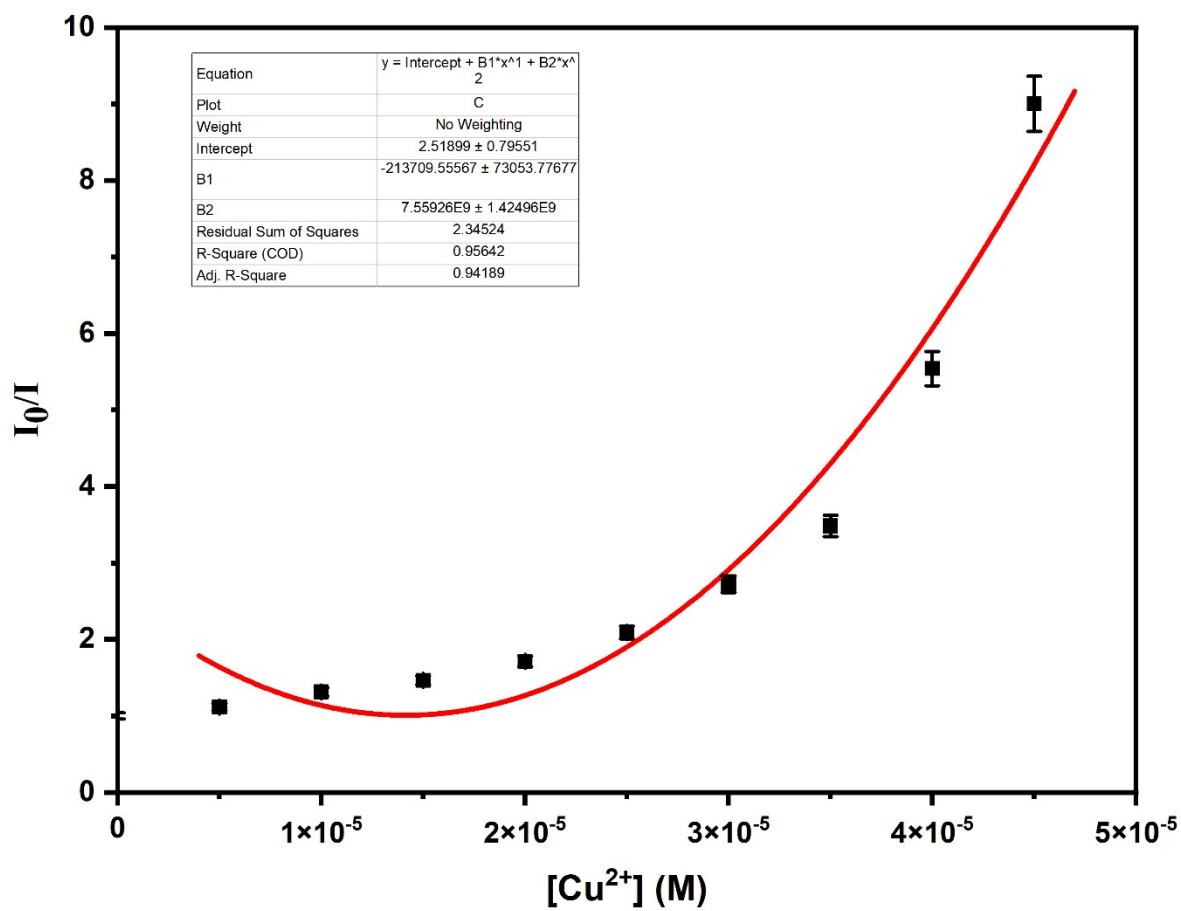

**Fig. S7.** Stern-volmer plot at high copper ion concentration

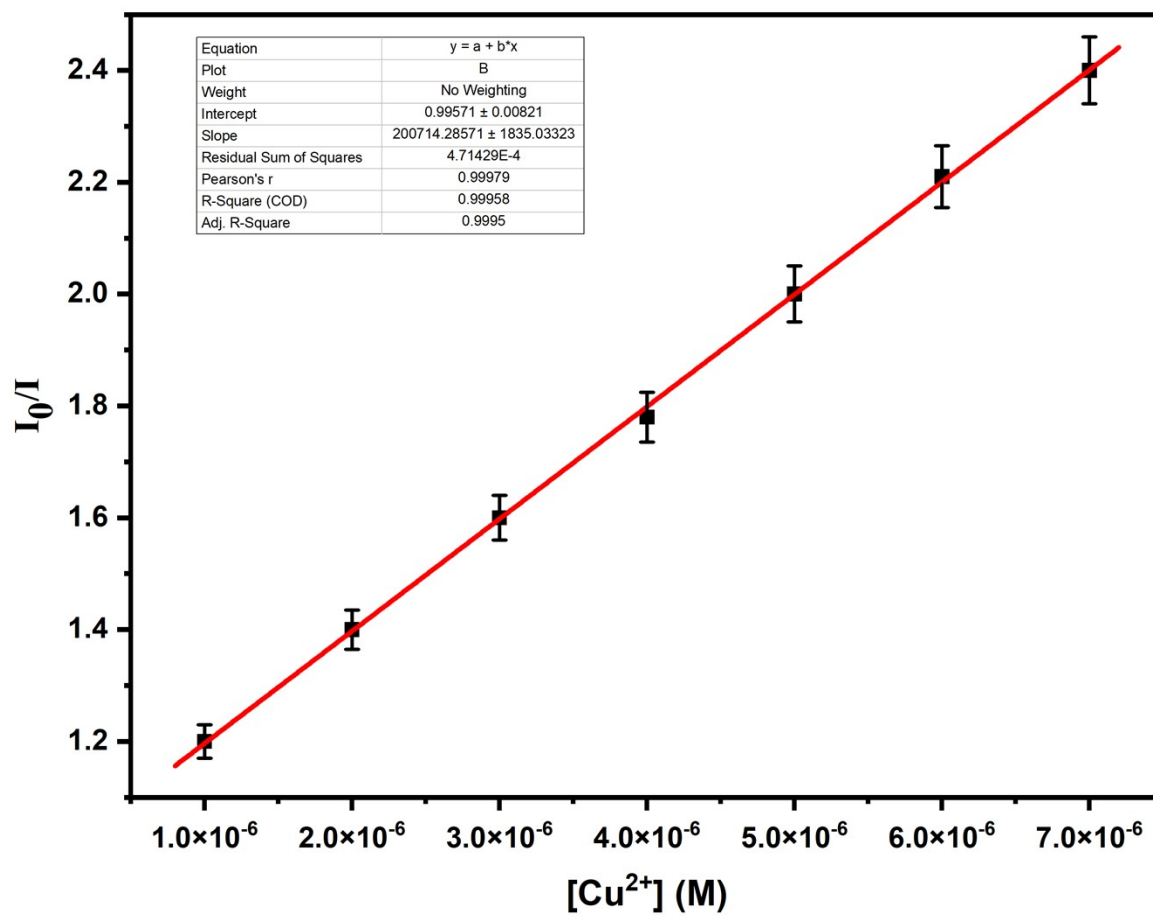

**Fig. S8.** Stern-volmer plot at low copper ion concentration

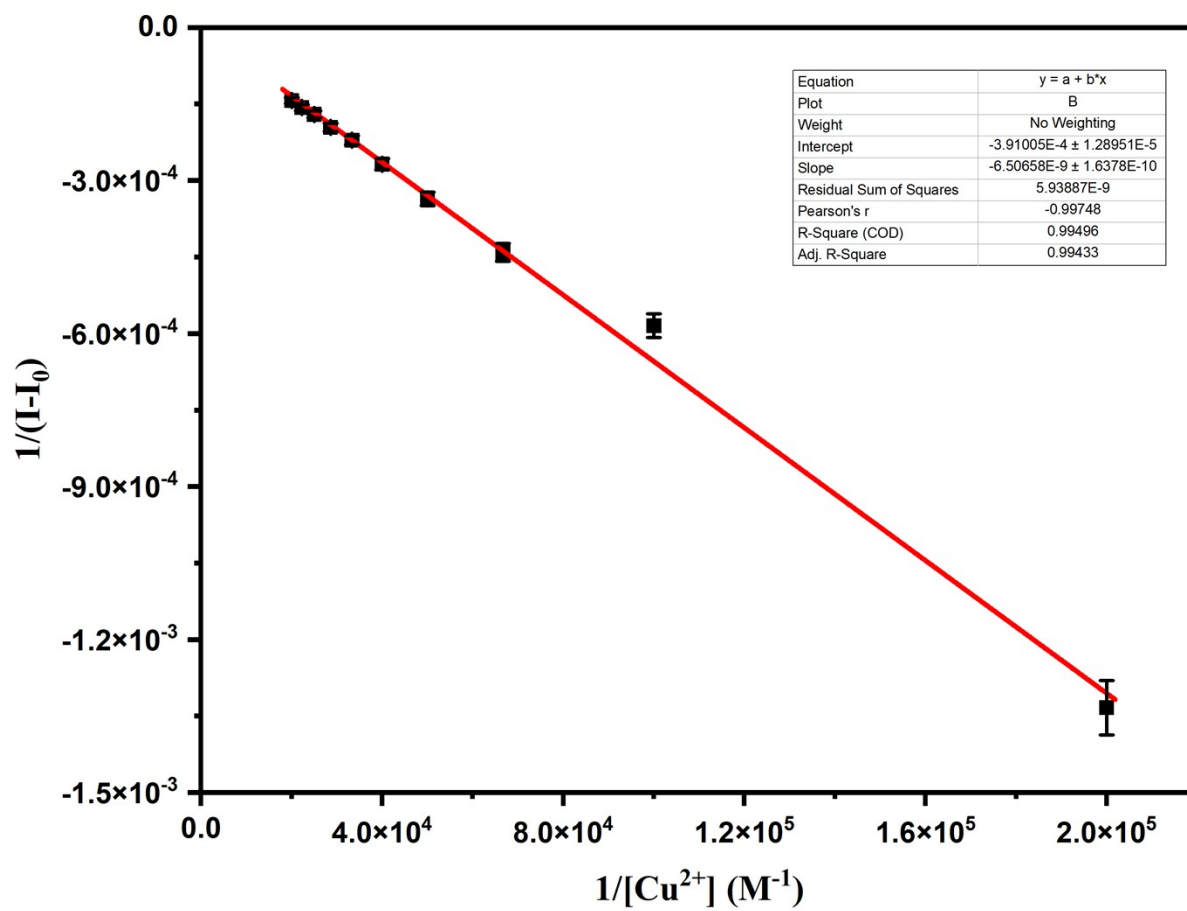

**Fig. S9.** BH-plot for binding constant determination

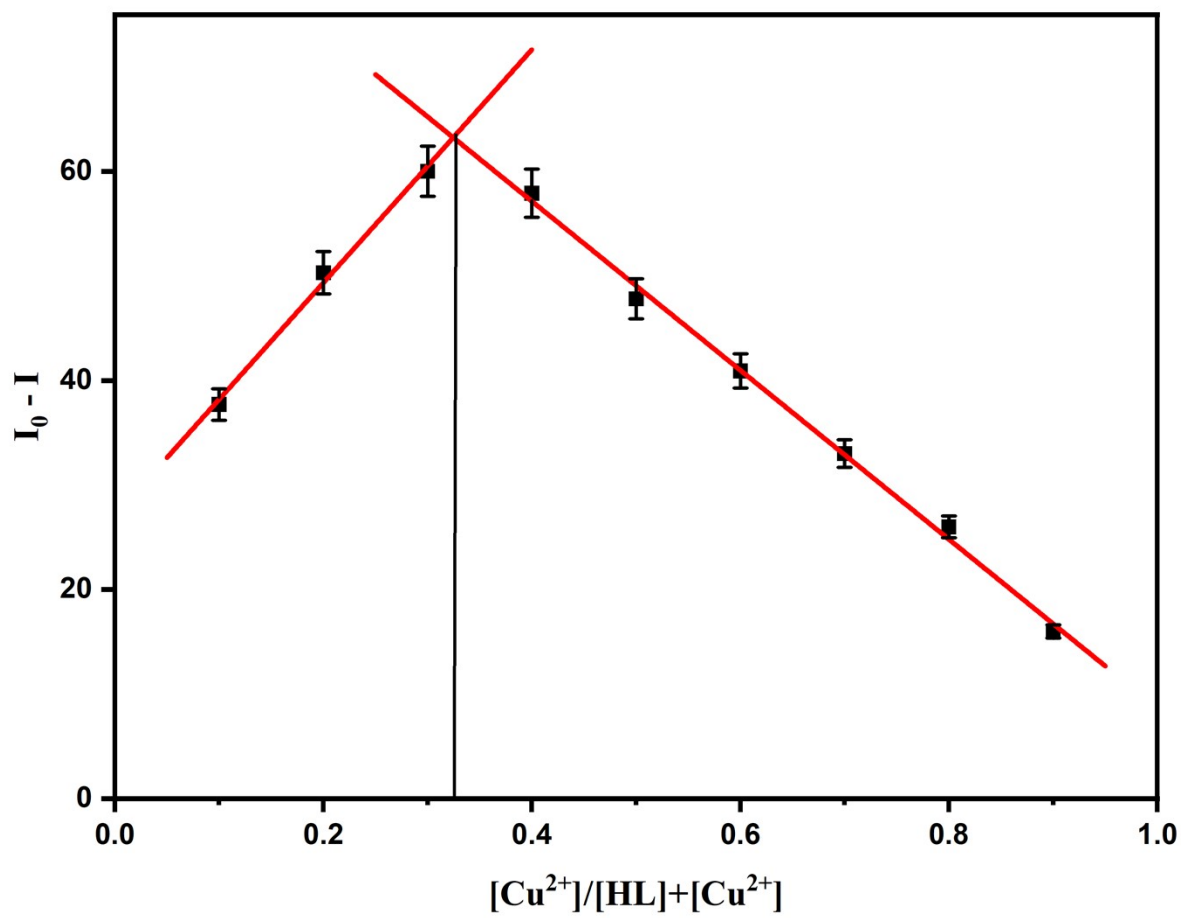

**Fig. S10.** Job's plot for binding stoichiometry determination



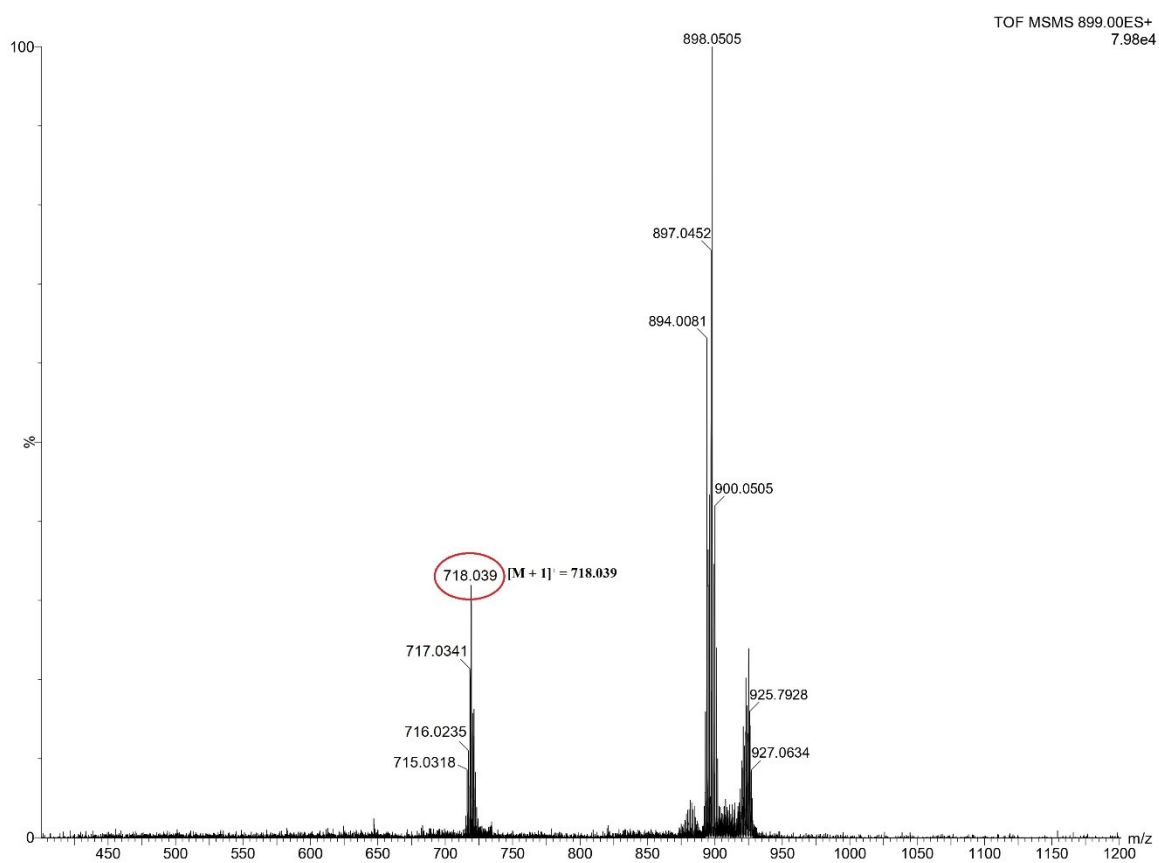

**Fig. S11.** ESI-MS spectra of [HL+Cu<sup>2+</sup>] complex

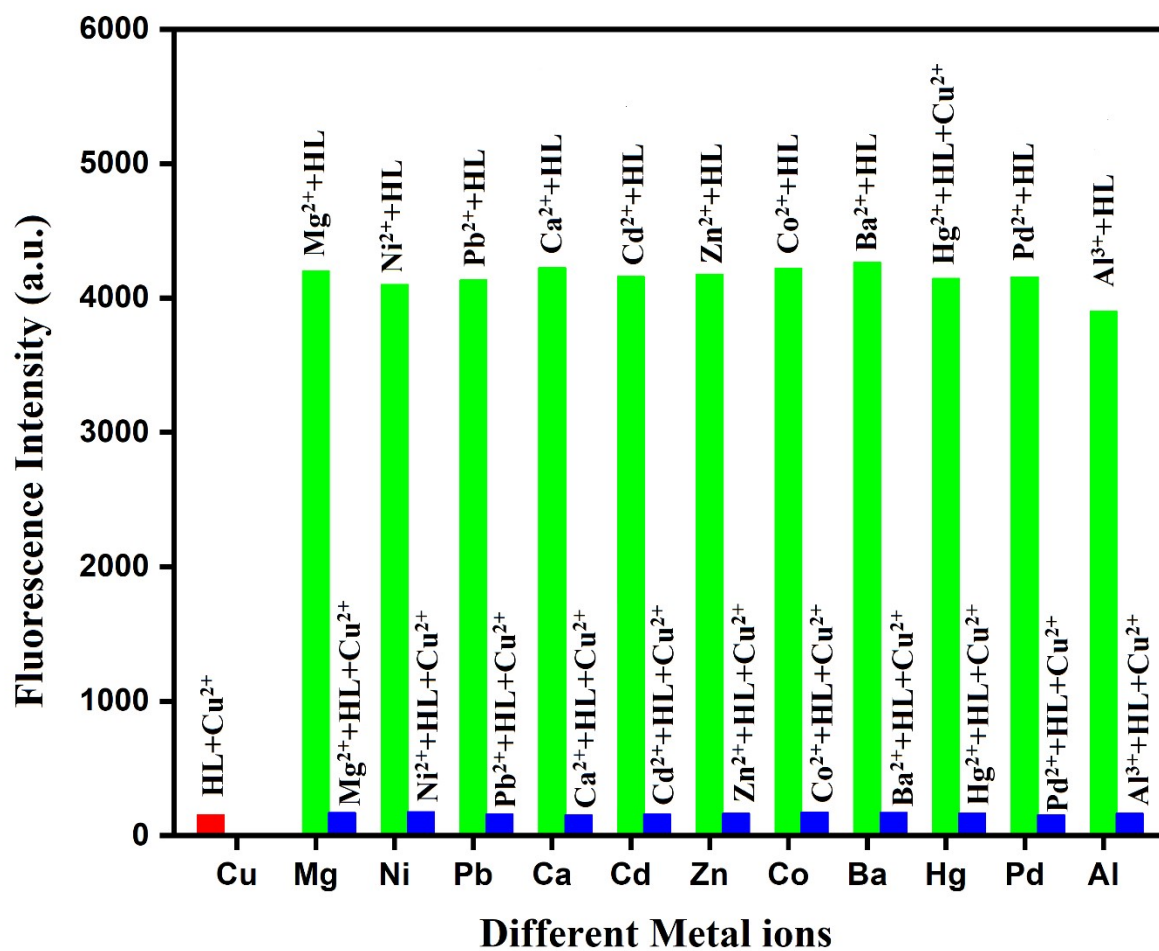

**Fig. S12.** Bar diagram illustrating interference study of **HL** (25  $\mu\text{M}$ ) with different metal ions (50  $\mu\text{M}$ ) in the solution of  $f_w = 95\%$

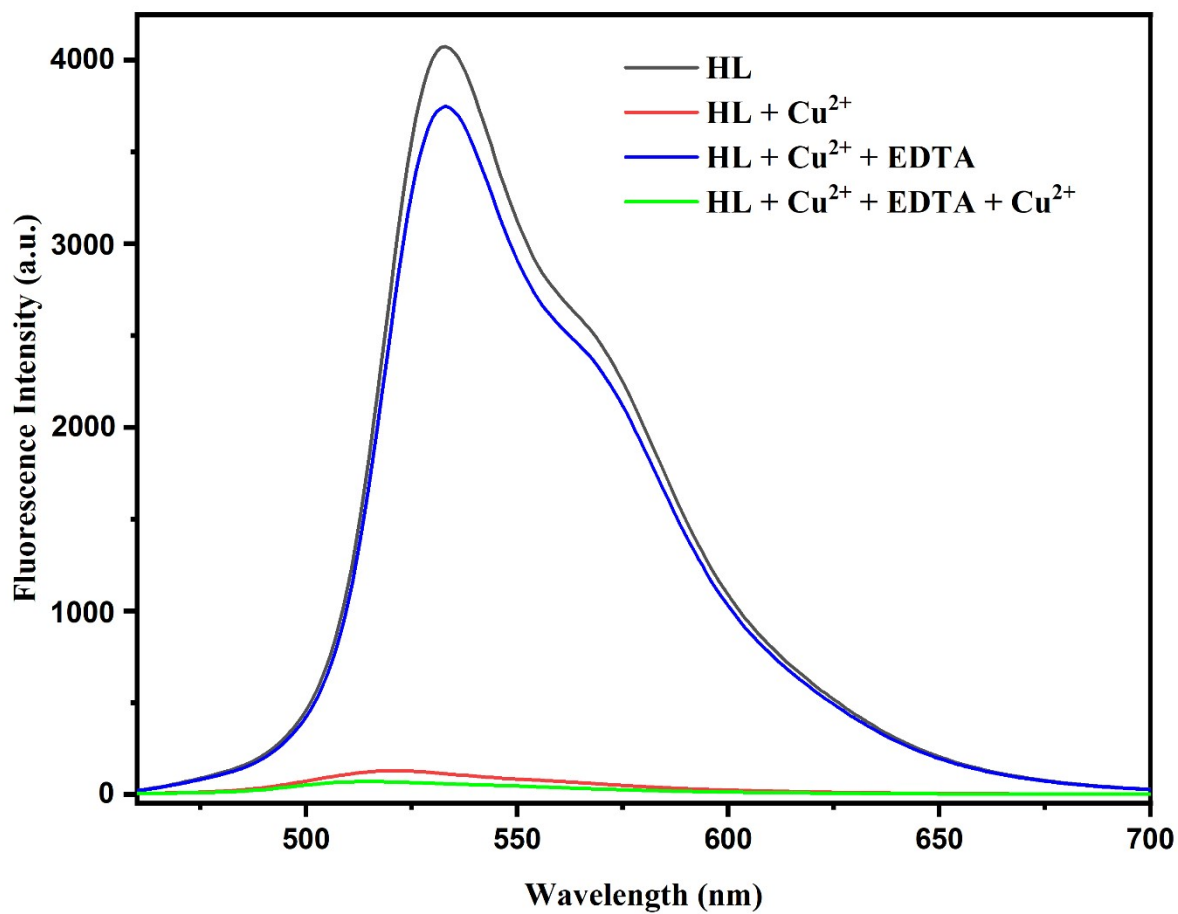

**Fig. S13.** Fluorescence spectra showing the reversible response of **HL** to Cu<sup>2+</sup> (25  $\mu$ M) after treatment with EDTA (25  $\mu$ M).

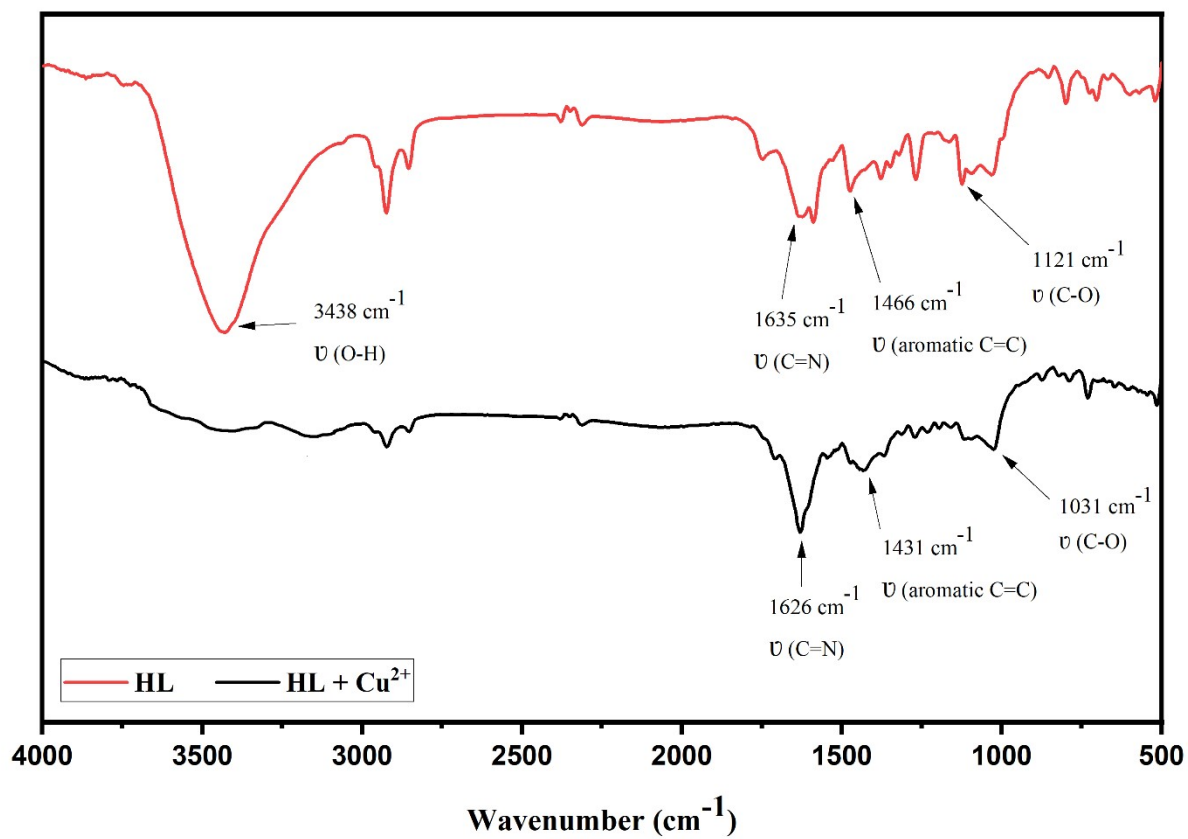

**Fig. S14.** FTIR comparison between **HL** and **HL+Cu<sup>2+</sup>** complex

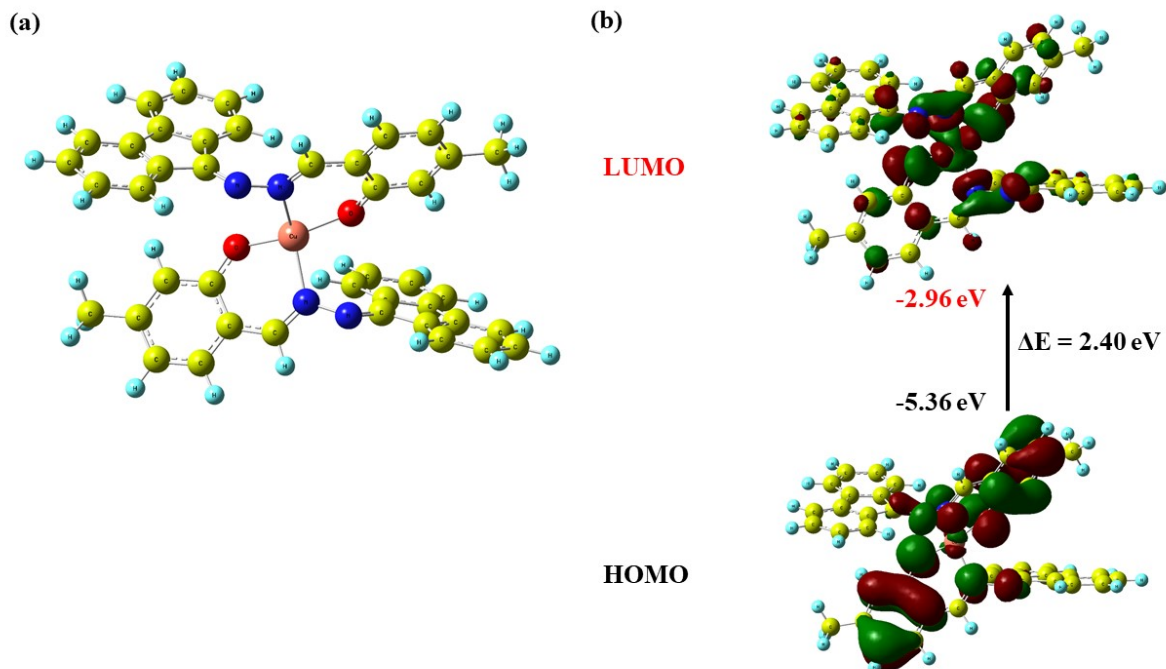

**Fig. S15.** (a) Optimized geometry of the **HL**+**Cu**<sup>2+</sup> complex, and (b) HOMO and LUMO structures of the **HL**+**Cu**<sup>2+</sup> complex.

**Table S1.** Crystal structure refinement parameters of **HL**

| Identification code  | HL                                                            |
|----------------------|---------------------------------------------------------------|
| CCDC number          | 2483407                                                       |
| Empirical formula    | C <sub>21</sub> H <sub>16</sub> N <sub>2</sub> O <sub>2</sub> |
| Formula weight       | 328.36                                                        |
| Temperature (K)      | 293(2)                                                        |
| Wavelength (Å)       | 0.71073                                                       |
| Crystal system       | monoclinic                                                    |
| Space group          | P <sub>1</sub> 2 <sub>1</sub> /c <sub>1</sub>                 |
| Unit cell dimensions |                                                               |
| a (Å)                | 10.2561(5)                                                    |
| b (Å)                | 7.5393(3)                                                     |
| c (Å)                | 21.0409(8)                                                    |
| α (deg)              | 90                                                            |

|                                                  |                                                            |
|--------------------------------------------------|------------------------------------------------------------|
| $\beta$ (deg)                                    | 98.471(4)                                                  |
| $\gamma$ (deg)                                   | 90                                                         |
| Volume (Å <sup>3</sup> )                         | 1609.21(12)                                                |
| Z                                                | 4                                                          |
| Calculated density (g/cm <sup>3</sup> )          | 1.355                                                      |
| F (000)                                          | 688                                                        |
| Absorption coefficient (mm <sup>-1</sup> )       | 0.088                                                      |
| Crystal size (mm <sup>3</sup> )                  | 0.14×0.17×0.2                                              |
| $\theta$ range (deg)                             | 2.0060 to 26.6790                                          |
| Limiting indices                                 | $-13 \leq h \leq 13, -9 \leq k \leq 9, -27 \leq l \leq 26$ |
| Reflections collected                            | 3346                                                       |
| Independent reflections                          | 2427                                                       |
| Data/restraints/parameters                       | 3346/0/232                                                 |
| Goodness-of-fit on F <sup>2</sup>                | 1.100                                                      |
| Final R indices [ $I_o > 2\sigma(I_o)$ ]         | 0.0407, wR <sub>2</sub> = 0.1090                           |
| Final R indices (all data)                       | 0.0599, wR <sub>2</sub> = 0.1167                           |
| Largest diff. Peak and hole (e·Å <sup>-3</sup> ) | -0.127 and 0.157                                           |

**Table S2.** Bond lengths of **HL** from Crystallographic data

| Atom 1 | Atom 2 | Bond length (Å) |
|--------|--------|-----------------|
| O001   | C00E   | 1.3584(16)      |
| O001   | C00P   | 1.4119(19)      |
| O002   | H002   | 0.8200          |
| O002   | C00C   | 1.3533(13)      |
| N003   | N004   | 1.3909(15)      |
| N003   | C00B   | 1.2957(15)      |
| N004   | C007   | 1.2930(15)      |
| C005   | C006   | 1.4098(17)      |

|      |      |            |
|------|------|------------|
| C005 | C007 | 1.4910(17) |
| C005 | C00H | 1.3821(18) |
| C006 | C009 | 1.4654(18) |
| C006 | C00D | 1.3840(17) |
| C007 | C008 | 1.4737(18) |
| C008 | C009 | 1.4008(17) |
| C008 | C00G | 1.3846(18) |
| C009 | C00I | 1.3819(18) |
| C00A | C00B | 1.4272(18) |
| C00A | C00C | 1.4005(18) |
| C00A | C00K | 1.4099(17) |
| C00B | H00B | 0.974(13)  |
| C00C | C00F | 1.3792(18) |
| C00D | H00D | 0.9300     |
| C00D | C00J | 1.3754(19) |
| C00E | C00F | 1.3829(17) |
| C00E | C00M | 1.395(2)   |
| C00F | H00F | 0.9300     |
| C00G | H00G | 0.9300     |
| C00G | C00O | 1.3873(19) |
| C00H | H00H | 0.9300     |
| C00H | C00L | 1.3925(18) |
| C00I | H00I | 0.9300     |
| C00I | C00N | 1.384(2)   |
| C00J | H00J | 0.9300     |
| C00J | C00L | 1.3787(19) |
| C00K | H00K | 0.9300     |
| C00K | C00M | 1.362(2)   |

|      |      |          |
|------|------|----------|
| C00L | H00L | 0.9300   |
| C00M | H00M | 0.9300   |
| C00N | H00N | 0.9300   |
| C00N | C00O | 1.386(2) |
| C00O | H00O | 0.9300   |
| C00P | H00A | 0.9600   |
| C00P | H00C | 0.9600   |
| C00P | H00E | 0.9600   |

**Table S3.** Bond angles of **HL** from Crystallographic data

| Atoms          | Bond angles (°) |
|----------------|-----------------|
| C00E—O001—C00P | 117.30(11)      |
| C00C—O002—H002 | 109.500         |
| C00B—N003—N004 | 111.96(11)      |
| C007—N004—N003 | 116.23(10)      |
| C006—C005—C007 | 107.26(11)      |
| C00H—C005—C006 | 119.48(11)      |
| C00H—C005—C007 | 133.25(12)      |
| C005—C006—C009 | 109.40(11)      |
| C00C—C00F—H00F | 120.000         |
| C00E—C00F—H00F | 120.000         |
| C008—C00G—H00G | 120.700         |
| C008—C00G—C00O | 118.56(14)      |
| C00O—C00G—H00G | 120.700         |
| C005—C00H—H00H | 120.400         |
| C005—C00H—C00L | 119.19(13)      |
| C00L—C00H—H00H | 120.400         |



|                |            |
|----------------|------------|
| C009—C00I—H00I | 120.800    |
| C009—C00I—C00N | 118.40(13) |
| C00N—C00I—H00I | 120.800    |
| C00D—C00J—H00J | 119.600    |
| C00D—C00J—C00L | 120.84(12) |
| C00L—C00J—H00J | 119.600    |
| C00A—C00K—H00K | 119.000    |
| C00M—C00K—C00A | 121.91(14) |
| C00M—C00K—H00K | 119.000    |
| C00H—C00L—H00L | 119.600    |
| C00J—C00L—C00H | 120.71(14) |
| C00J—C00L—H00L | 119.600    |
| C00E—C00M—H00M | 120.100    |
| C00K—C00M—C00E | 119.72(12) |
| C00K—C00M—H00M | 120.100    |
| C00I—C00N—H00N | 119.500    |
| C00I—C00N—C00O | 121.08(14) |
| C00O—C00N—H00N | 119.500    |
| C00G—C00O—H00O | 119.600    |
| C00N—C00O—C00G | 120.74(14) |
| C00N—C00O—H00O | 119.600    |
| O001—C00P—H00A | 109.500    |
| O001—C00P—H00C | 109.500    |
| O001—C00P—H00E | 109.500    |
| H00A—C00P—H00C | 109.500    |
| H00A—C00P—H00E | 109.500    |
| H00C—C00P—H00E | 109.500    |
| C00D—C006—C005 | 120.59(12) |

**Table S4.**  
angles of **HL**

|                |            |                 |
|----------------|------------|-----------------|
| C00D—C006—C009 | 130.01(12) | Torsion<br>from |
| N004—C007—C005 | 134.13(12) |                 |
| N004—C007—C008 | 119.71(11) |                 |
| C008—C007—C005 | 106.08(10) |                 |
| C009—C008—C007 | 109.01(11) |                 |
| C00G—C008—C007 | 130.56(12) |                 |
| C00G—C008—C009 | 120.42(13) |                 |
| C008—C009—C006 | 108.10(11) |                 |
| C00I—C009—C006 | 131.10(12) |                 |
| C00I—C009—C008 | 120.80(12) |                 |
| C00C—C00A—C00B | 122.07(11) |                 |
| C00C—C00A—C00K | 117.07(12) |                 |
| C00K—C00A—C00B | 120.84(12) |                 |
| N003—C00B—C00A | 122.79(13) |                 |
| N003—C00B—H00B | 117.9(7)   |                 |
| C00A—C00B—H00B | 119.3(7)   |                 |
| O002—C00C—C00A | 120.86(12) |                 |
| O002—C00C—C00F | 117.78(12) |                 |
| C00F—C00C—C00A | 121.36(11) |                 |
| C006—C00D—H00D | 120.500    |                 |
| C00J—C00D—C006 | 119.09(13) |                 |
| C00J—C00D—H00D | 120.500    |                 |
| O001—C00E—C00F | 124.32(14) |                 |
| O001—C00E—C00M | 115.71(12) |                 |
| C00F—C00E—C00M | 119.97(13) |                 |
| C00C—C00F—C00E | 119.97(13) |                 |

Crystallographic data

| Atoms               | Torsion angles Bond angles (°) |
|---------------------|--------------------------------|
| O001—C00E—C00F—C00C | 179.38(11)                     |
| O001—C00E—C00M—C00K | -179.23(11)                    |
| O002—C00C—C00F—C00E | -179.28(11)                    |
| N003—N004—C007—C005 | 0.76(19)                       |
| N003—N004—C007—C008 | -175.54(9)                     |
| N004—N003—C00B—C00A | -179.45(10)                    |
| N004—C007—C008—C009 | 173.88(10)                     |
| N004—C007—C008—C00G | -4.6(2)                        |
| C005—C006—C009—C008 | 1.06(13)                       |
| C005—C006—C009—C00I | -178.51(12)                    |
| C005—C006—C00D—C00J | 2.72(17)                       |
| C005—C007—C008—C009 | -3.36(12)                      |
| C005—C007—C008—C00G | 178.14(12)                     |
| C005—C00H—C00L—C00J | 0.9(2)                         |
| C006—C005—C007—N004 | -172.71(12)                    |
| C006—C005—C007—C008 | 3.95(12)                       |
| C006—C005—C00H—C00L | 1.77(18)                       |
| C006—C009—C00I—C00N | 179.32(12)                     |
| C006—C00D—C00J—C00L | -0.06(19)                      |
| C007—C005—C006—C009 | -3.13(12)                      |
| C007—C005—C006—C00D | 177.08(10)                     |
| C007—C005—C00H—C00L | -179.12(12)                    |
| C007—C008—C009—C006 | 1.51(13)                       |
| C007—C008—C009—C00I | -178.87(10)                    |
| C007—C008—C00G—C00O | 179.25(12)                     |
| C008—C009—C00I—C00N | -0.20(18)                      |
| C008—C00G—C00O—C00N | -1.22(19)                      |
| C009—C006—C00D—C00J | -177.02(12)                    |
| C009—C008—C00G—C00O | 0.89(18)                       |
| C009—C00I—C00N—C00O | -0.14(19)                      |

|                     |             |
|---------------------|-------------|
| C00A—C00C—C00F—C00E | 0.0(2)      |
| C00A—C00K—C00M—C00E | -0.4(2)     |
| C00B—N003—N004—C007 | -179.7(1)   |
| C00B—C00A—C00C—O002 | 1.16(19)    |
| C00B—C00A—C00C—C00F | -178.14(11) |
| C00B—C00A—C00K—C00M | 178.32(12)  |
| C00C—C00A—C00B—N003 | -2.49(19)   |
| C00C—C00A—C00K—C00M | -0.15(19)   |
| C00D—C006—C009—C008 | -179.18(12) |
| C00D—C006—C009—C00I | 1.3(2)      |
| C00D—C00J—C00L—C00H | -1.8(2)     |
| C00F—C00E—C00M—C00K | 0.71(19)    |
| C00G—C008—C009—C006 | -179.81(11) |
| C00G—C008—C009—C00I | -0.19(17)   |
| C00H—C005—C006—C009 | 176.19(10)  |
| C00H—C005—C006—C00D | -3.60(17)   |
| C00H—C005—C007—N004 | 8.1(2)      |
| C00H—C005—C007—C008 | -175.24(13) |
| C00I—C00N—C00O—C00G | 0.9(2)      |
| C00K—C00A—C00B—N003 | 179.11(11)  |
| C00K—C00A—C00C—O002 | 179.61(11)  |
| C00K—C00A—C00C—C00F | 0.31(18)    |
| C00M—C00E—C00F—C00C | -0.56(19)   |
| C00P—O001—C00E—C00F | -5.16(19)   |
| C00P—O001—C00E—C00M | 174.78(11)  |

**Table S5.** Photophysical properties of probe **HL** (50  $\mu$ M) in different solvents.

| <b>Solvents</b>         | $\lambda_{\text{abs}} \text{ (nm)}^{\text{a}}$ | $\epsilon \text{ (10}^4 \text{ M}^{-1} \text{ cm}^{-1})$ | $\lambda_{\text{em}} \text{ (nm)}^{\text{b}}$ | <b>Stokes Shift<br/>(nm/cm<sup>-1</sup>)<sup>c</sup></b> | <b>%Quantum<br/>Yield<sup>d</sup></b> |
|-------------------------|------------------------------------------------|----------------------------------------------------------|-----------------------------------------------|----------------------------------------------------------|---------------------------------------|
| <b>DMSO</b>             | 350                                            | 3.2                                                      | 550                                           | 200/<br>50000                                            | 26.19                                 |
| <b>DMF</b>              | 345                                            | 1.5                                                      | 548                                           | 203/<br>49261.1                                          | 32.45                                 |
| <b>ACN</b>              | 330                                            | 1.9                                                      | 516                                           | 186/<br>53763.44                                         | 34.50                                 |
| <b>DCM</b>              | 330                                            | 1.5                                                      | 513                                           | 183/<br>54644.8                                          | 30.11                                 |
| <b>THF</b>              | 329                                            | 1.8                                                      | 513                                           | 184/<br>54347.82                                         | 22.45                                 |
| <b>CHCl<sub>3</sub></b> | 329                                            | 1.7                                                      | 512                                           | 183/<br>54644.8                                          | 27.89                                 |
| <b>Toluene</b>          | 329                                            | 1.9                                                      | 509                                           | 180/<br>55555.56                                         | 24.55                                 |
| <b>Hexane</b>           | 325                                            | 1.9                                                      | 509                                           | 184/<br>54347.82                                         | 24.68                                 |

<sup>a</sup> The absorption maximum in nm.

<sup>b</sup> The emission maximum in nm.

<sup>c</sup> Stokes shift calculated from absorption maximum to emission maximum.

<sup>d</sup> Fluorescence quantum yield.

**Table S6.** The average particle size of **HL** in different water fractions.

| Average particle size in different water fractions (nm) |              |              |              |
|---------------------------------------------------------|--------------|--------------|--------------|
| $f_w = 30\%$                                            | $f_w = 50\%$ | $f_w = 70\%$ | $f_w = 95\%$ |
| 145.36                                                  | 204.05       | 222.78       | 547.21       |

**Table S7.** A comparison of previously published sensors based on detection of  $\text{Cu}^{2+}$  ions.

| Sl no | Structure of Chemosensor                                                            | Emission wave length (nm) | LOD values (M)        | Type of Fluorescence  | Ref. |
|-------|-------------------------------------------------------------------------------------|---------------------------|-----------------------|-----------------------|------|
| 1     | 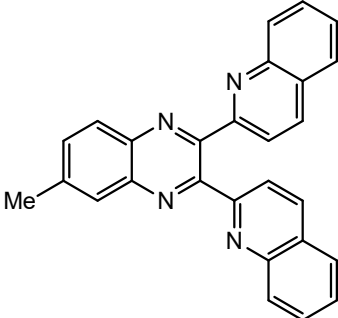 | 500                       | $0.39 \times 10^{-6}$ | Colorimetric          | [13] |
| 2     |  | 560                       | $1.01 \times 10^{-8}$ | Turn-off fluorescence | [14] |

|   |                                                                                     |     |                       |                       |      |
|---|-------------------------------------------------------------------------------------|-----|-----------------------|-----------------------|------|
| 3 | 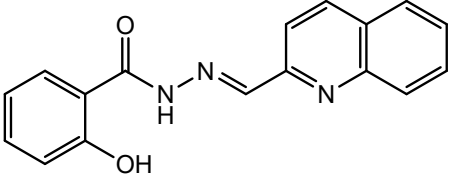   | 468 | $8.68 \times 10^{-6}$ | On-off fluorescence   | [15] |
| 4 |    | 460 | $5 \times 10^{-7}$    | Turn-off fluorescence | [16] |
| 5 |   | 463 | $1.5 \times 10^{-6}$  | Colorimetric          | [17] |
| 6 |  | 500 | $10 \times 10^{-6}$   | Turn-on fluorescence  | [18] |
| 7 |  | 437 | $7.1 \times 10^{-6}$  | Turn-off fluorescence | [19] |

|    |                                                                                    |     |                       |                       |           |
|----|------------------------------------------------------------------------------------|-----|-----------------------|-----------------------|-----------|
| 8  | 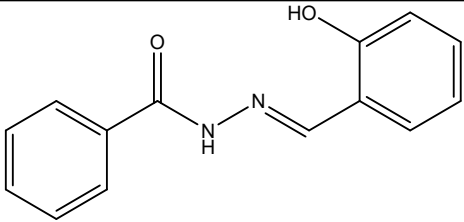  | 490 | $5.6 \times 10^{-6}$  | Turn-off fluorescence | [20]      |
| 9  |   | 570 | $1.75 \times 10^{-6}$ | Turn-off fluorescence | [21]      |
| 10 |   | 434 | $2.84 \times 10^{-6}$ | On-off fluorescence   | [22]      |
| 11 |  | 548 | $23.4 \times 10^{-9}$ | Turn-off fluorescence | This work |

**Table S8.** Real water and biological samples analysis by **HL** for copper ions.

| Sources | Test | Spiked (equivalent) | Found (equivalent)   | Recovery Percentage (%) | R.S.D (n-3) |
|---------|------|---------------------|----------------------|-------------------------|-------------|
| Tap     | T-1  | 0                   | -                    | -                       | -           |
|         | T-2  | 0.02                | $0.0194 \pm 0.00056$ | 97                      | 0.137       |
| Lake    | T-3  | 0                   | -                    | -                       | -           |
|         | T-4  | 0.02                | $0.0189 \pm 0.00045$ | 94.5                    | 0.269       |



|              |     |      |                      |      |       |
|--------------|-----|------|----------------------|------|-------|
| <b>River</b> | T-5 | 0    | -                    | -    | -     |
|              | T-6 | 0.02 | $0.0202 \pm 0.00011$ | 101  | 1.063 |
| <b>Urine</b> | T-7 | 0    | -                    | -    | -     |
|              | T-8 | 0.02 | $0.0179 \pm 0.00081$ | 89.5 | 0.607 |

## References:

- [1] A. Jain, P. Saraswat, S. De, H. Roy, B. Nath, S.S. Ghosh, P. Barman, Position-induced differential aggregation behavior with red-shifted emission: A case study of the promising copper ion sensor skeleton-based regio-isomers, *J. Photochem. Photobiol. A Chem.* 458 (2025) 115931.
- [2] A. Schiafer, H. Horn, R. Ahlrichs, Fully optimized contracted Gaussian basis sets for atoms Li to Kr, *J. Chem. Phys.* 97 (1992) 2571.
- [3] A.D. Becke, Density-functional thermochemistry. III. The role of exact exchange, *J. Chem. Phys.* 98 (1993) 5648–5652.
- [4] C.W. Bauschlicher Jr, H. Partridge, A modification of the Gaussian-2 approach using density functional theory, *J. Chem. Phys.* 103 (1995) 1788–1791.
- [5] M.J. Snare, F.E. Treloar, K.P. Ghiggino, P.J. Thistlethwaite, The photophysics of rhodamine B, *J. Photochem.* 18 (1982) 335–346.
- [6] M. Arshad, A. Paul, A. Joseph, Nanoscale detection of copper using an aggregation induced emission enhancement fluorescent sensor derived from hydroxy naphthaldehyde and benzyloxy benzaldehyde, *J. Photochem. Photobiol. A Chem.* 444 (2023) 114983.
- [7] X.-J. Yan, Z.-G. Wang, Y. Wang, Y.-Y. Huang, H.-B. Liu, C.-Z. Xie, Q.-Z. Li, J.-Y. Xu, A dual-functional fluorescent probe for sequential determination of  $\text{Cu}^{2+}/\text{S}^{2-}$  and its applications in biological systems, *Spectrochim. Acta Part A Mol. Biomol. Spectrosc.* 243 (2020) 118797.
- [8] J.R. Lakowicz, Instrumentation for fluorescence spectroscopy, in: *Princ. Fluoresc. Spectrosc.*, Springer, 1999: pp. 25–61.
- [9] S. Gurusamy, K. Krishnaveni, M. Sankarganesh, R.N. Asha, A. Mathavan, Synthesis, characterization, DNA interaction, BSA/HSA binding activities of VO (IV), Cu (II) and Zn (II) Schiff base complexes and its molecular docking with biomolecules, *J. Mol. Liq.* 345 (2022) 117045.
- [10] S.O. Bahaffi, A.A.A. Aziz, M.M. El-Naggar, Synthesis, spectral characterization, DNA binding ability and antibacterial screening of copper (II) complexes of symmetrical

- NOON tetradentate Schiff bases bearing different bridges, *J. Mol. Struct.* 1020 (2012) 188–196.
- [11] B. Kumar, J. Devi, Chetna, B. Taxak, Insights into antimalarial and anti-tuberculosis activities of Schiff base transition metal complexes: molecular docking and ADMET profiling approaches, *Res. Chem. Intermed.* 51 (2025) 411–431.
  - [12] S. Sharma, A. Sharma, U. Gupta, Molecular Docking studies on the Anti-fungal activity of *Allium sativum* (Garlic) against Mucormycosis (black fungus) by BIOVIA discovery studio visualizer 21.1. 0.0, (2021).
  - [13] S.R. Alizadeh, P. Biparva, M.A. Ebrahimzadeh, A novel quinoxaline-based multifunctional probe: Sensitive and selective naked-eye detection of  $\text{Fe}^{3+}$  and fluorescent sensing of  $\text{Cu}^{2+}$  and its application, *Arab. J. Chem.* 17 (2024) 105724.
  - [14] P.N. Borase, P.B. Thale, G.S. Shankarling, Dihydroquinazolinone based “turn-off” fluorescence sensor for detection of  $\text{Cu}^{2+}$  ions, *Dye. Pigment.* 134 (2016) 276–284.
  - [15] C. Gao, X. Liu, X. Jin, J. Wu, Y. Xie, W. Liu, X. Yao, Y. Tang, A retrievable and highly selective fluorescent sensor for detecting copper and sulfide, *Sensors Actuators B Chem.* 185 (2013) 125–131.
  - [16] H.S. Jung, P.S. Kwon, J.W. Lee, J. Il Kim, C.S. Hong, J.W. Kim, S. Yan, J.Y. Lee, J.H. Lee, T. Joo, Coumarin-derived  $\text{Cu}^{2+}$ -selective fluorescence sensor: synthesis, mechanisms, and applications in living cells, *J. Am. Chem. Soc.* 131 (2009) 2008–2012.
  - [17] K.B. Kim, H. Kim, E.J. Song, S. Kim, I. Noh, C. Kim, A cap-type Schiff base acting as a fluorescence sensor for zinc (II) and a colorimetric sensor for iron (II), copper (II), and zinc (II) in aqueous media, *Dalt. Trans.* 42 (2013) 16569–16577.
  - [18] S. Mandal, S.K. Mandal, A.R. Khuda-Bukhsh, S. Goswami, Pyridoxal based fluorescent chemosensor for detection of copper (II) in solution with moderate selectivity and live cell imaging, *J. Fluoresc.* 25 (2015) 1437–1447.
  - [19] W. Cao, X.-J. Zheng, D.-C. Fang, L.-P. Jin, Metal ion-assisted ring-opening of a quinazoline-based chemosensor: detection of copper (II) in aqueous media, *Dalt. Trans.* 44 (2015) 5191–5196.
  - [20] E. Espada-Bellido, M.D. Galindo-Riaño, M. García-Vargas, R. Narayanaswamy, Selective chemosensor for copper ions based on fluorescence quenching of a schiff-base fluorophore, *Appl. Spectrosc.* 64 (2010) 727–732.
  - [21] M. Umare, D.A. Patel, V. Bhardwaj, A.K. Sk, S.K. Sahoo, Pyridoxal Derived AIEgen for fluorescence turn-off sensing of  $\text{Cu}^{2+}$  and  $\text{Fe}^{2+}$  ions and fluorescence imaging of latent fingerprints, *J. Fluoresc.* 33 (2023) 601–611.
  - [22] D. Wang, J.-Q. Zheng, X.-J. Zheng, D.-C. Fang, D.-Q. Yuan, L.-P. Jin, A fluorescent chemosensor for the sequential detection of copper (II) and histidine and its biological applications, *Sensors Actuators B Chem.* 228 (2016) 387–394.
